# Supplementary material
Source: PubMed Central journal article supplement (PMC3926197)

Figure S1

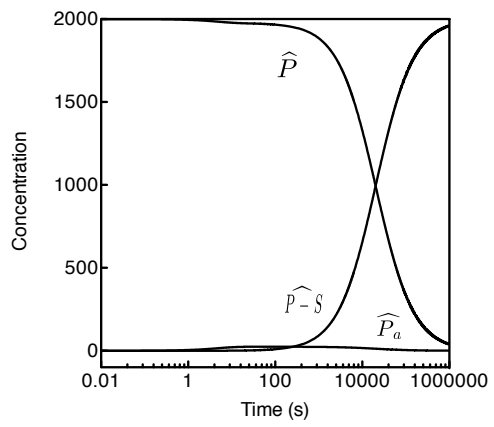

Figure S2

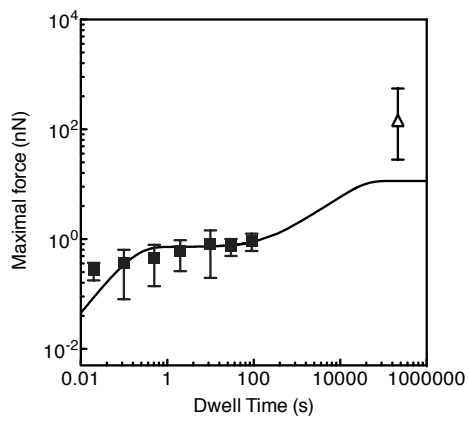

Figure S3

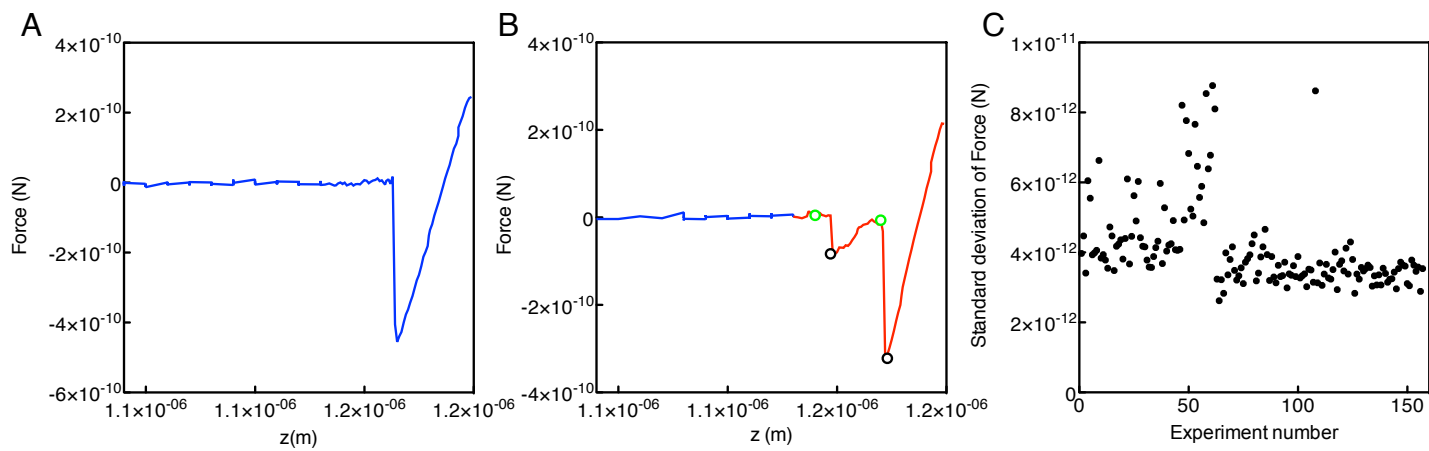

Figure S4

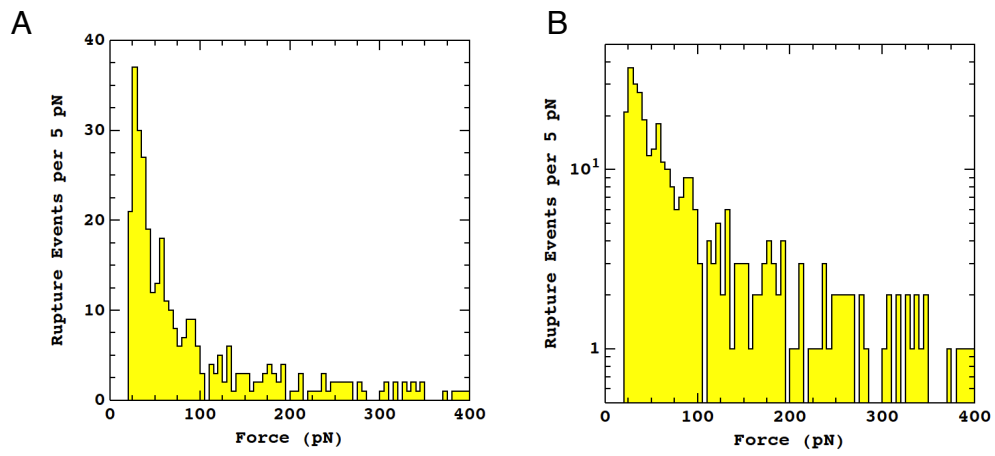

Figure S5

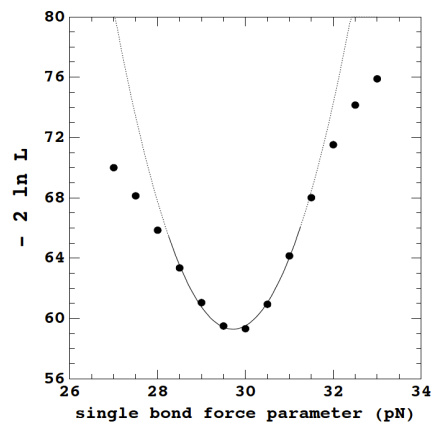

Figure S6

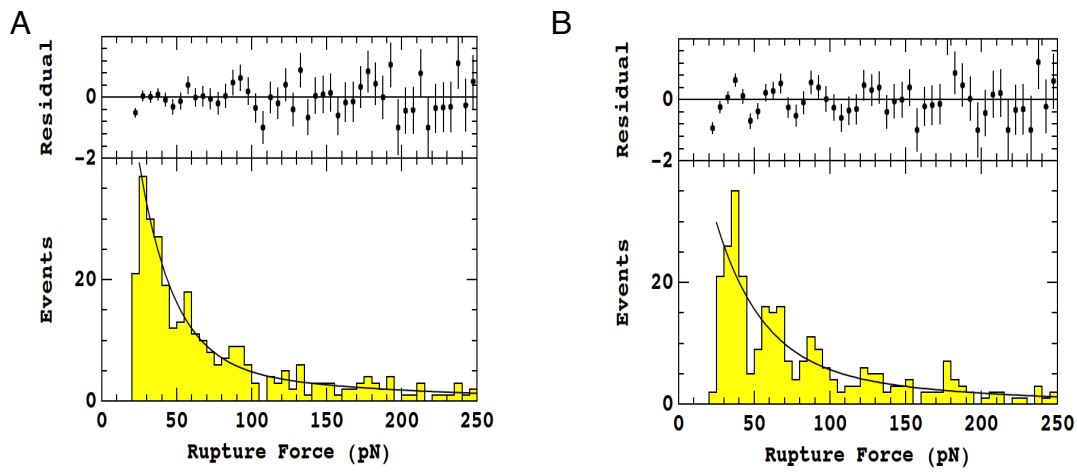

Figure S7

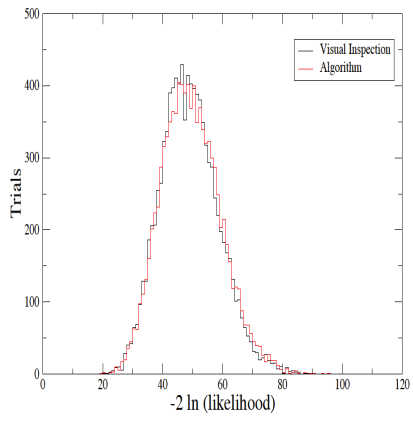

Supplement: NIHMS522410-supplement-1_si_002.pdf [file NIHMS522410-supplement-1_si_002.pdf]
